# Supplementary material for: Molecular Identification of African Nymphaea Species (Water Lily) Based on ITS, trnT-trnF and rpl16
Source: MDPI journal article supplement (doi:10.3390/plants11182431), 2022-09-18
Supplement: s1 [file s1]

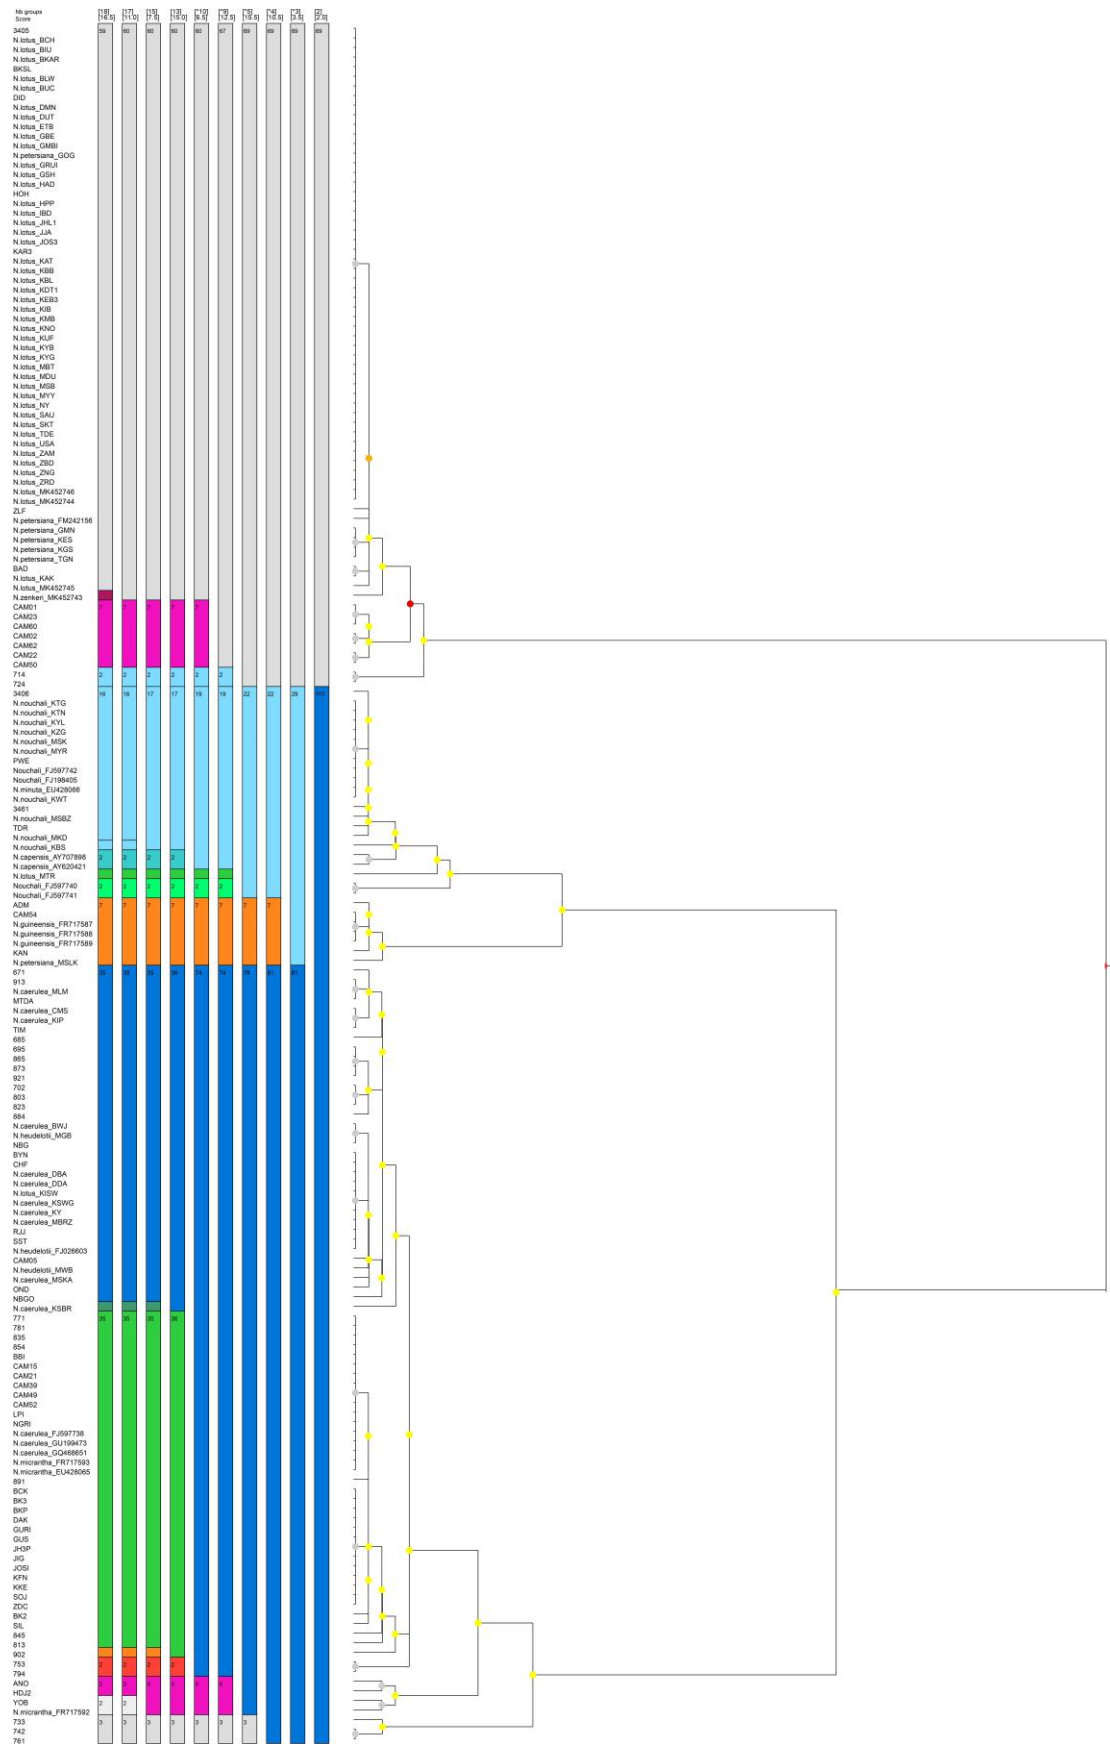

**Figure S1** ITS partition strategy through ASAP algorithm.

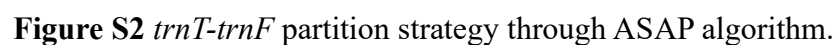

**Figure S2** *trnT-trnF* partition strategy through ASAP algorithm.

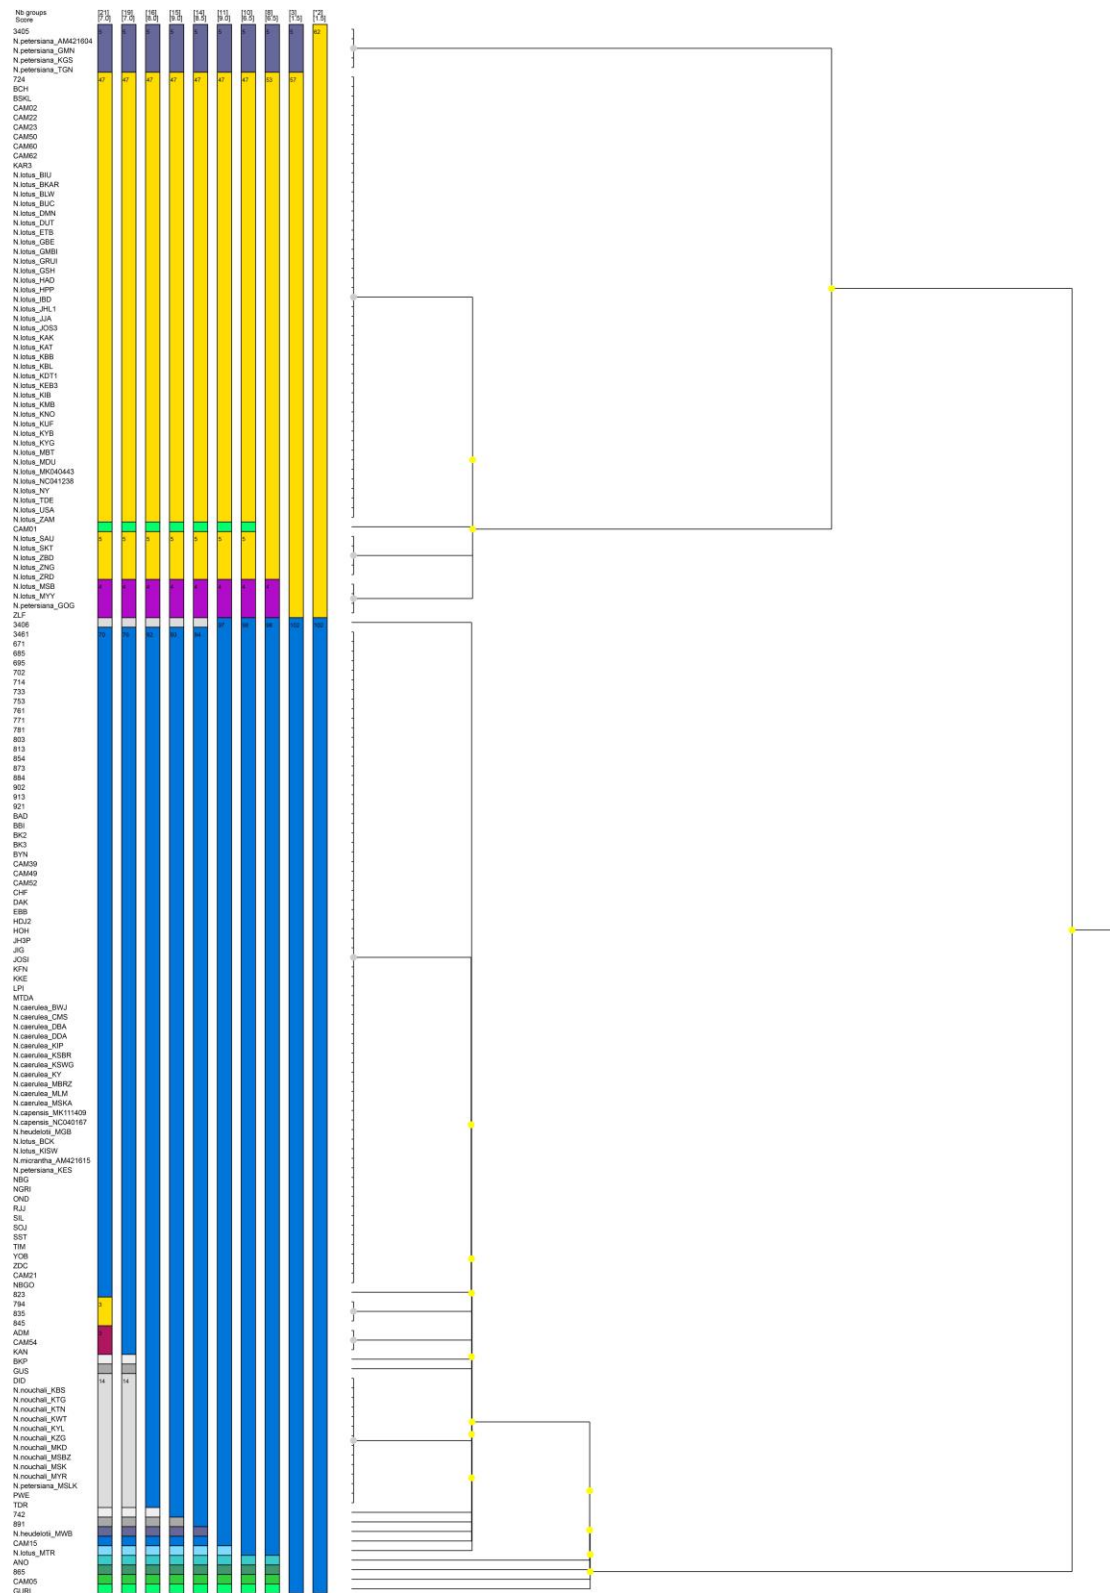

**Figure S3** *rpl16* partition strategy through ASAP algorithm.

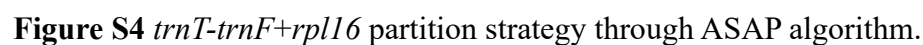

**Figure S4** *trnT-trnF+rpl16* partition strategy through ASAP algorithm.

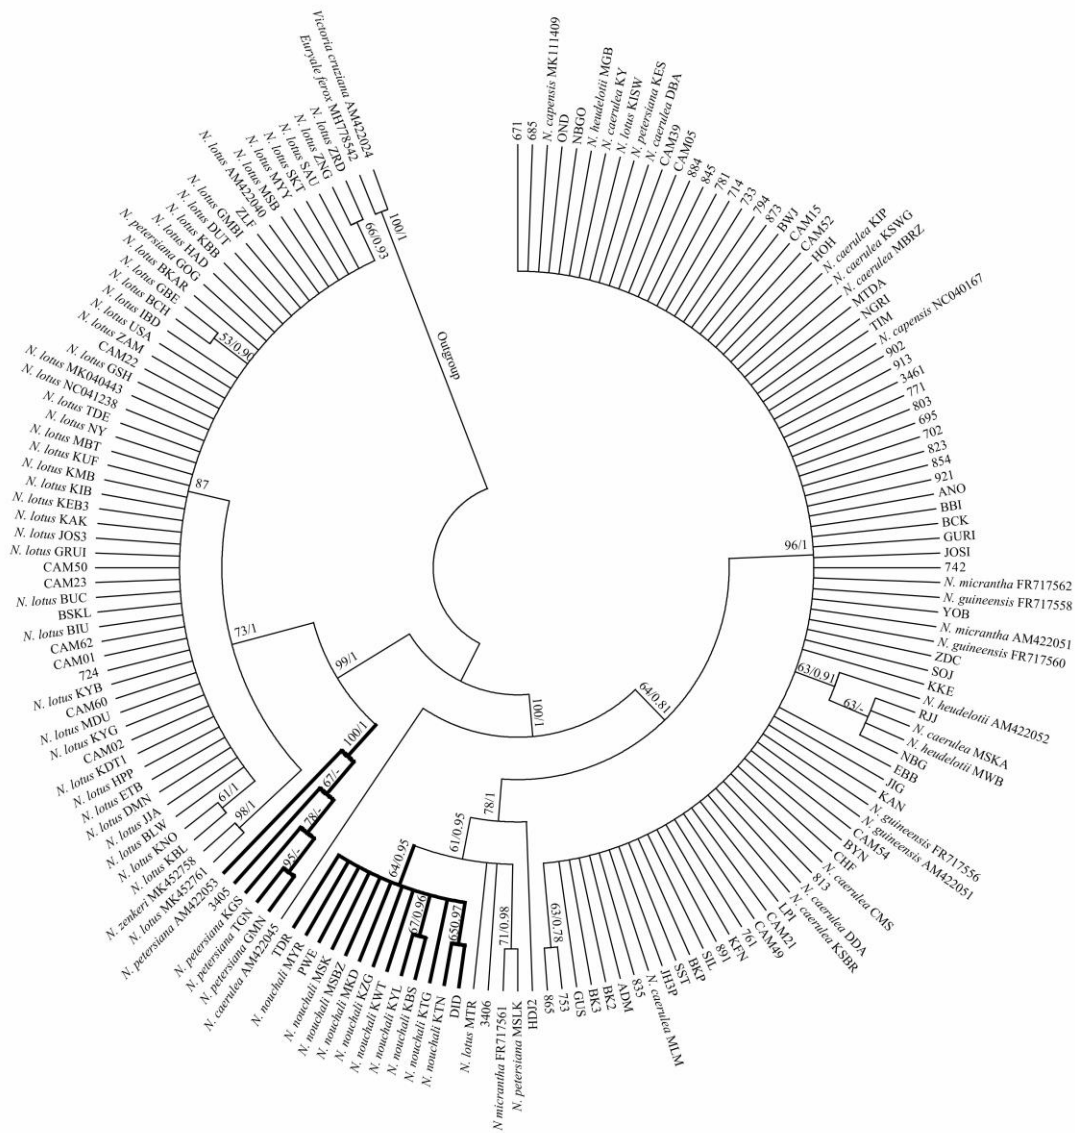

**Figure S5** Phylogenetic tree constructed based on 167 *trnT-trnF* sequences of *Nymphaea*. Bootstrap values (> 50) and posterior probabilities (>0.5) based on NJ and BI analysis are shown above the branches. The rough branches mean identified species by *trnT-trnF* tree.

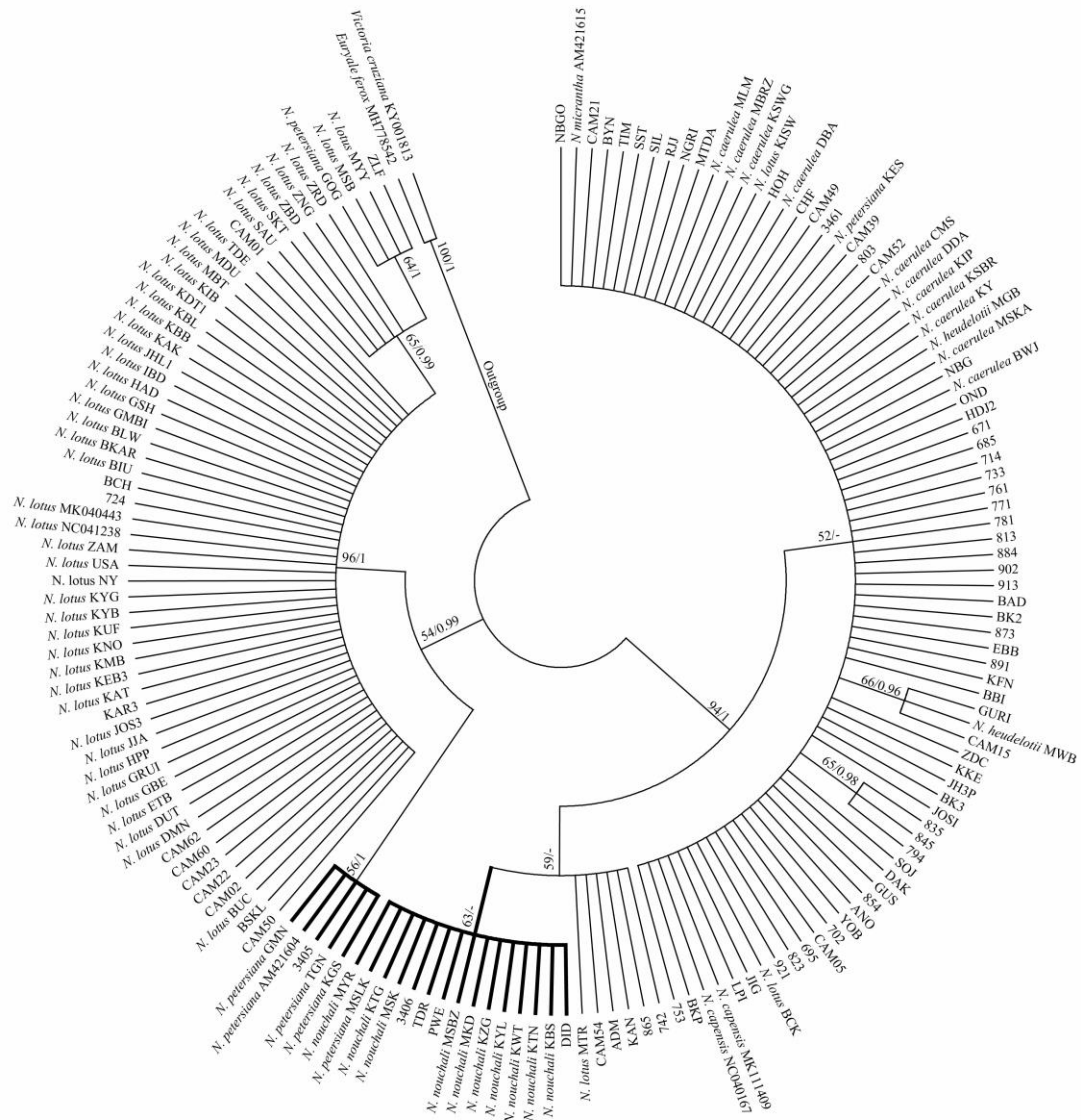

**Figure S6** Phylogenetic tree constructed based on 164 *rpl16* sequences of *Nymphaea*. Bootstrap values (> 50) and posterior probabilities (>0.5) based on NJ and BI analysis are shown above the branches. The rough branches mean identified species by *rpl16* tree.

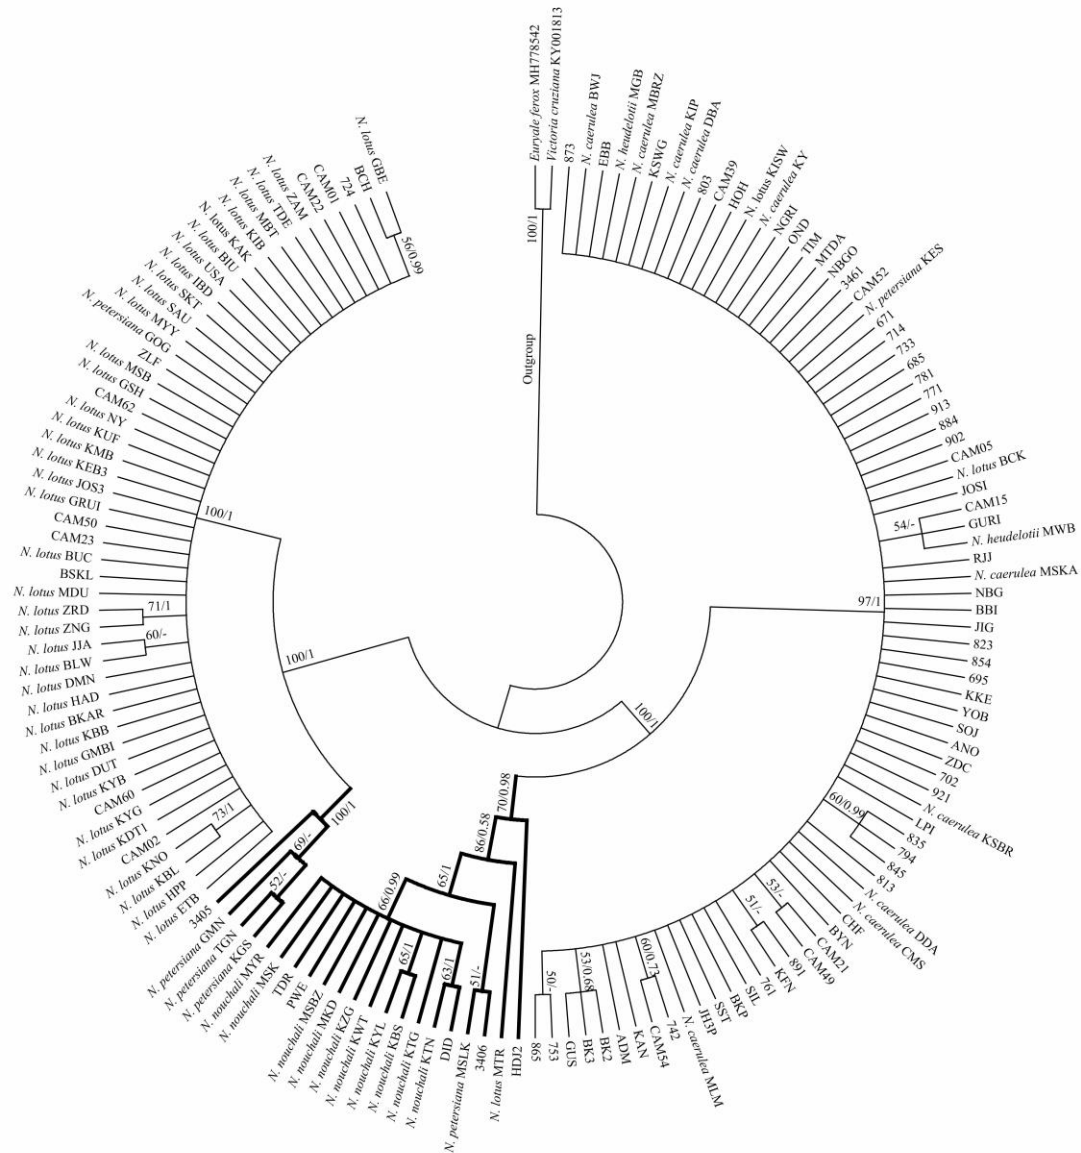

**Figure S7 Phylogenetic tree constructed based on 152 *trnT-trnF+rpl16* sequences of *Nymphaea*.** Bootstrap values (> 50) and posterior probabilities (>0.5) based on NJ and BI analysis are shown above the branches. The rough branches mean identified species by *trnT-trnF+rpl16* tree.
