# Supplementary material for: Molecular Identification of African Nymphaea Species (Water Lily) Based on ITS, trnT-trnF and rpl16
Source: Plants (Basel). 2022 Sep 18;11(18):2431. doi: 10.3390/plants11182431 (PMC9503883; doi:10.3390/plants11182431)
Supplement: Supplementary file 1 [file plants-11-02431-s001.zip › Supplementary Tables S1-S6.xlsx]

## Sheet: Table S1
Table S1. Sample information of African Nymphaea
No.	Morphological taxonomy	Sample location	Longitude	Latitude	Accession No.
					ITS	trnT-trnF	rpl16
671	Nymphaea sp.	Zambia	24.7983	-14.7775	MW798802	MW809732	MW809884
685	Nymphaea sp.	Zambia	24.6805	-14.8558	MW798803	MW809733	MW809885
695	Nymphaea sp.	Zambia	24.3427	-14.958	MW798804	MW809734	MW809886
702	Nymphaea sp.	Zambia	24.3427	-14.8394	MW798805	MW809735	MW809887
714	Nymphaea sp.	Zambia	30.3938	-12.6205	MW798806	MW809736	MW809888
724	blue flower	Zambia	30.2183	-12.8427	MW798807	MW809737	MW809889
733	yellow flower	Zambia	31.3327	-12.0322	MW798808	MW809738	MW809890
742	pink flower	Zambia	31.245	-10.1475	MW798809	MW809739	MW809891
753	pink &white	Zambia	31.2311	-9.3927	MW798810	MW809740	MW809892
761	yellow flower	Zambia	31.2311	-9.3927	MW798811	MW809741	MW809893
771	pink & white flower	Zambia	30.578	-9.55944	MW798812	MW809742	MW809894
781	pink & white flower	Zambia	30.5775	-9.4916	MW798813	MW809743	MW809895
794	pink & white flower	Zambia	31.3527	-12.1288	MW798814	MW809744	MW809896
803	pink & white flower	Zambia	32.2269	-13.9355	MW798815	MW809745	MW809897
813	pink & white flower	Zambia	29.8175	-12.108	MW798816	MW809746	MW809898
823	pink & white flower	Zambia	24.6624	-17.2883	MW798817	MW809747	MW809899
835	pink & white flower	Zambia	23.628	-16.6522	MW798818	MW809748	MW809900
845	white	Zambia	23.5219	-16.5238	MW798819	MW809749	MW809901
854	pink & white flower	Zambia	23.073	-15.2452	MW798820	MW809750	MW809902
865	pink & white flower	Zambia	24.2577	-14.8883	MW798821	MW809751	MW809903
873	pink & white flower	Zambia	24.2622	-14.8875	MW798822	MW809752	MW809904
884	white	Zambia	24.8681	-14.825	MW798823	MW809753	MW809905
891	white	Zambia	28.6425	-13.5477	MW798824	MW809754	MW809906
902	white	Zambia	28.6864	-13.3005	MW798825	MW809755	MW809907
913	white	Zambia	27.5091	-12.4127	MW798826	MW809756	MW809908
921	Nymphaea sp.	Zambia	24.1472	-15.0214	MW798827	MW809757	MW809909
3405	Nymphaea sp.	Madagascar	47.1833	-20.4317	MW798799	MW809758	MW809910
3406	Nymphaea sp.	Madagascar	49.4333	-17.25	MW798800	MW809759	MW809911
3461	Nymphaea sp.	Madagascar	48.4308	-18.8894	MW798801	MW809760	MW809912
ADM	small white flower	Nigeria	11.9033	7.0467	MW798828	MW809761	MW809913
ANO	pink flower	Nigeria	8.6843	11.8579	MW798829	MW809762	MW809914
BAD	purple flower	Nigeria	6.1378	9.0525	MW798830	/	MW809915
BBI	purple flower	Nigeria	4.2274	12.4791	MW798831	MW809763	MW809916
BCH	N. lotus	Nigeria	10.5584	11.2597	MW798832	MW809764	MW809917
BCK	pink flower	Nigeria	10.5184	11.2554	MW798833	MW809765	MW809918
BIU	N. lotus	Nigeria	13.3612	12.2525	MW798834	MW809766	MW809919
BK2	purple flower	Nigeria	10.5184	11.2554	MW798835	MW809767	MW809920
BK3	purple flower	Nigeria	9.8521	10.4099	MW798836	MW809768	MW809921
BKAR	N. lotus	Nigeria	10.5184	11.2554	MW798837	MW809769	MW809922
BKP	purple flower	Nigeria	10.5563	11.2614	MW798838	MW809770	MW809923
BLW	N. lotus	Uganda	33.1558	1.12362	MW798839	MW809771	MW809924
BSKL	small leaf	Nigeria	10.5184	11.2554	MW798840	MW809772	MW809925
BUC	N. lotus	Nigeria	10.5563	11.2614	MW798841	MW809773	MW809926
BWJ	N. caerulea	Tanzania	35.7104	-7.7454	MW798842	MW809774	MW809927
BYN	Nymphaea sp.	Uganda	29.9392	-1.2665	MW798843	MW809775	MW809928
CAM01	Nymphaea sp.	Cameroun	9.8394	2.4894	MW798844	MW809776	MW809929
CAM02	Nymphaea sp.	Cameroun	9.8478	2.6431	MW798845	MW809777	MW809930
CAM05	Nymphaea sp.	Cameroun	9.8453	4.0003	MW798846	MW809778	MW809931
CAM15	Nymphaea sp.	Cameroun	10.0694	5.4447	MW798847	MW809779	MW809932
CAM21	Nymphaea sp.	Cameroun	11.4228	3.4425	MW798848	MW809780	MW809933
CAM22	Nymphaea sp.	Cameroun	11.5122	3.4425	MW798849	MW809781	MW809934
CAM23	Nymphaea sp.	Cameroun	11.5061	3.5142	MW798850	MW809782	MW809935
CAM39	Nymphaea sp.	Cameroun	11.3364	2.6036	MW798851	MW809783	MW809936
CAM49	Nymphaea sp.	Cameroun	12.1336	2.7844	MW798852	MW809784	MW809937
CAM50	Nymphaea sp.	Cameroun	11.9367	3.0847	MW798853	MW809785	MW809938
CAM52	Nymphaea sp.	Cameroun	12.0914	2.8097	MW798854	MW809786	MW809939
CAM54	Nymphaea sp.	Cameroun	9.6083	4.1064	MW798855	MW809787	MW809940
CAM60	Nymphaea sp.	Cameroun	11.4558	3.8019	MW798856	MW809788	MW809941
CAM62	Nymphaea sp.	Cameroun	9.8567	2.6733	MW798857	MW809789	MW809942
CHF	Nymphaea sp.	Uganda	29.7732	-1.3066	MW798858	MW809790	MW809943
CMS	N. caerulea	Kenya	35.6259	0.0898	MW798859	MW809791	MW809944
DAK	purple flower	Nigeria	7.7619	11.0815	MW798860	/	MW809945
DBA	N. caerulea	Uganda	30.4523	-0.5968	MW798861	MW809792	MW809946
DDA	N. caerulea	Kenya	34.7391	-0.1422	MW798862	MW809793	MW809947
DID	Nymphaea sp.	Kenya	39.8031	-3.4242	MW798863	MW809794	MW809948
DMN	N. lotus	Kenya	34.1686	0.0206	MW798864	MW809795	MW809949
DUT	N. lotus	Nigeria	7.6968	11.1228	MW798865	MW809796	MW809950
EBB	Nymphaea sp.	Nigeria	4.2595	12.4876	/	MW809797	MW809951
ETB	N. lotus	Uganda	32.4946	0.0893	MW798866	MW809798	MW809952
GBE	N. lotus	Nigeria	11.6676	10.0657	MW798867	MW809799	MW809953
GMBI	N. lotus	Nigeria	11.1676	10.2824	MW798868	MW809800	MW809954
GMN	N. petersiana	Tanzania	38.899	-5.1479	MW798869	MW809801	MW809955
GOG	N. petersiana	Kenya	39.7595	-3.8241	MW798870	MW809802	MW809956
GRUI	N. lotus	Nigeria	10.4615	12.868	MW798871	MW809803	MW809957
GSH	N. lotus	Nigeria	11.0479	12.2574	MW798872	MW809804	MW809958
GURI	purple flower	Nigeria	10.4717	12.8734	MW798873	MW809805	MW809959
GUS	purple flower	Nigeria	6.6835	12.1957	MW798874	MW809806	MW809960
HAD	N. lotus	Nigeria	10.2283	12.6477	MW798875	MW809807	MW809961
HDJ2	Nymphaea sp.	Nigeria	9.9832	12.4227	MW798876	MW809808	MW809962
HOH	Nymphaea sp.	Kenya	37.0765	-0.4678	MW798877	MW809809	MW809963
HPP	N. lotus	Kenya	34.7409	-0.1251	MW798878	MW809810	MW809964
IBD	N. lotus	Uganda	30.5756	-0.1398	MW798879	MW809811	MW809965
JH3P	purple flower	Nigeria	10.2283	12.6477	MW798880	MW809812	MW809966
JHL1	N. lotus	Nigeria	10.0332	12.4345	MW798881	MW809813	MW809967
JIG	purple flower	Nigeria	9.9832	12.4227	MW798882	/	MW809968
JJA	N. lotus	Uganda	33.2023	0.4854	MW798883	MW809814	MW809969
JOS3	N. lotus	Nigeria	8.8995	9.8569	MW798884	MW809815	MW809970
JOSI	purple flower	Nigeria	8.9312	9.8724	MW798885	MW809816	MW809971
KAK	N. lotus	Nigeria	7.312	11.7156	MW798886	MW809817	MW809972
KAN	small white flower	Nigeria	8.6843	11.8579	MW798887	MW809818	MW809973
KAR3	small white flower	Nigeria	10.5184	11.2554	MW798888	/	MW809974
KAT	N. lotus	Nigeria	7.7692	13.172	MW798889	/	MW809975
KBB	N. lotus	Nigeria	4.2274	12.4791	MW798890	MW809819	MW809976
KBL	N. lotus	Nigeria	4.2595	12.4876	MW798891	MW809820	MW809977
KBS	N. nouchali	Tanzania	39.0565	-6.5779	MW798892	MW809821	MW809978
KDT1	N. lotus	Nigeria	7.7228	12.6918	MW798893	MW809822	MW809979
KEB3	N. lotus	Nigeria	4.2595	12.4876	MW798894	MW809823	MW809980
KES	N. petersiana	Kenya	35.3311	-0.287627	MW798895	MW809824	MW809981
KFN	pink flower	Nigeria	7.3953	11.0989	MW798896	MW809825	MW809982
KGS	N. petersiana	Tanzania	38.8568	-5.3867	MW798897	MW809826	MW809983
KIB	N. lotus	Kenya	34.745	-0.1593	MW798898	MW809827	MW809984
KIP	N. caerulea	Kenya	35.5157	-0.311436	MW798899	MW809828	MW809985
KISW	N. lotus	Uganda	30.3445	-0.366779	MW798900	MW809829	MW809986
KKE	pink flower	Nigeria	7.312	11.7156	MW798901	MW809830	MW809987
KMB	N. lotus	Tanzania	38.6347	-4.60897	MW798902	MW809831	MW809988
KNO	N. lotus	Nigeria	8.6843	11.8579	MW798903	MW809832	MW809989
KSBR	N. caerulea	Uganda	33.1454	-0.780411	MW798904	MW809833	MW809990
KSWG	N. caerulea	Uganda	30.3445	-0.366779	MW798905	MW809834	MW809991
KTG	N. nouchali	Tanzania	38.8538	-5.30767	MW798906	MW809835	MW809992
KTN	N. nouchali	Tanzania	38.9362	-5.3331	MW798907	MW809836	MW809993
KUF	N. lotus	Nigeria	7.3953	11.0989	MW798908	MW809837	MW809994
KWT	N. nouchali	Tanzania	38.6795	-4.76559	MW798909	MW809838	MW809995
KY	N. caerulea	Uganda	32.8761	-1.43259	MW798910	MW809839	MW809996
KYB	N. lotus	Kenya	34.1699	0.0496	MW798911	MW809840	MW809997
KYG	N. lotus	Uganda	32.8761	-1.4325	MW798912	MW809841	MW809998
KYL	N. nouchali	Tanzania	33.8511	-9.5833	MW798913	MW809842	MW809999
KZG	N. nouchali	Kenya	39.8039	-3.4027	MW798914	MW809843	MW810000
LPI	purple flower	Nigeria	6.5584	9.0489	MW798915	MW809844	MW810001
MBRZ	N. caerulea	Uganda	31.6004	0.1118	MW798916	MW809845	MW810002
MBT	N. lotus	Kenya	30.2765	-0.4753	MW798917	MW809846	MW810003
MDU	N. lotus	Tanzania	37.5323	-6.6628	MW798918	MW809847	MW810004
MGB	N. heudelotii	Uganda	30.4069	0.409	MW798919	MW809848	MW810005
MKD	N. nouchali	Tanzania	38.9638	-5.1366	MW798920	MW809849	MW810006
MLM	N. caerulea	Kenya	35.6138	-0.0095	MW798921	MW809850	MW810007
MSB	N. lotus	Tanzania	34.9167	-7.6501	MW798922	MW809851	MW810008
MSBZ	N. nouchali	Tanzania	38.3893	-5.0755	MW798923	MW809852	MW810009
MSK	N. nouchali	Tanzania	38.8988	-5.2828	MW798924	MW809853	MW810010
MSKA	N. caerulea	Uganda	31.7139	-0.3364	MW798925	MW809854	MW810011
MSLK	N. petersiana	Tanzania	38.7632	-5.1614	MW798926	MW809855	MW810012
MTDA	Nymphaea sp.	Uganda	29.6725	-1.2585	MW798927	MW809856	MW810013
MTR	N. lotus	Tanzania	35.9367	-7.04	MW798928	MW809857	MW810014
MWB	N. heudelotii	Uganda	30.2765	0.4753	MW798929	MW809858	MW810015
MYR	N. nouchali	Tanzania	35.7531	-3.7033	MW798930	MW809859	MW810016
MYY	N. lotus	Tanzania	38.5725	-4.2939	MW798931	MW809860	MW810017
NBG	Nymphaea sp.	Uganda	30.2887	0.4864	MW798932	MW809861	MW810018
NBGO	Nymphaea sp.	Uganda	31.8523	0.1835	MW798933	MW809862	MW810019
NGRI	purple flower	Nigeria	10.4615	12.868	MW798934	MW809863	MW810020
NY	N. lotus	Kenya	34.8366	-0.1543	MW798935	MW809864	MW810021
OND	Nymphaea sp.	Kenya	36.661	-1.2523	MW798936	MW809865	MW810022
PWE	Nymphaea sp.	Tanzania	38.9694	-5.1366	MW798937	MW809866	MW810023
RJJ	Nymphaea sp.	Uganda	31.1145	-0.338	MW798938	MW809867	MW810024
SAU	N. lotus	Nigeria	11.0657	12.8477	MW798939	MW809868	MW810025
SIL	Nymphaea sp.	Kenya	35.5739	0.1334	MW798940	MW809869	MW810026
SKT	N. lotus	Nigeria	5.2741	13.2245	MW798941	MW809870	MW810027
SOJ	Nymphaea sp.	Nigeria	8.9272	9.8791	MW798942	MW809871	MW810028
SST	Nymphaea sp.	Kenya	35.5541	0.0437	MW798943	MW809872	MW810029
TDE	N. lotus	Tanzania	37.0318	-6.5444	MW798944	MW809873	MW810030
TDR	Nymphaea sp.	Tanzania	37.3512	-11.1167	MW798945	MW809874	MW810031
TGN	N.petersiana	Tanzania	38.7569	-5.1847	MW798946	MW809875	MW810032
TIM	Nymphaea sp.	Kenya	35.5411	0.4429	MW798947	MW809876	MW810033
USA	N. lotus	Kenya	34.7171	-0.1007	MW798948	MW809877	MW810034
YOB	purple flower	Nigeria	11.0479	12.2574	MW798949	MW809878	MW810035
ZAM	N. lotus	Nigeria	6.7019	12.1757	MW798950	MW809879	MW810036
ZBD	N. lotus	Nigeria	3.8608	7.4229	MW798951	/	MW810037
ZDC	purple flower	Nigeria	7.762	11.0823	MW798952	MW809880	MW810038
ZLF	Nymphaea sp.	Kenya	39.7936	-3.3731	MW798953	MW809881	MW810039
ZNG	N. lotus	Nigeria	7.7319	11.0594	MW798954	MW809882	MW810040
ZRD	N.lotus	Nigeria	6.4253	12.2437	MW798955	MW809883	MW810041

## Sheet: Table S2
Table S2. The results of species identification using BLAST search from GenBank
No.	Morphological taxonomy	GenBank species (ITS)	Identical sites（%）	GenBank species(trnT-trnF)	Identical sites（%）	Subgenus	Together identification
671	Nymphaea sp.	N. caerulea	99.3	N. capensis	100	Brachyceras	N. nouchali var. caerulea
685	Nymphaea sp.	N. caerulea	99.0	N. capensis	99.9	Brachyceras	N. nouchali var. caerulea
695	Nymphaea sp.	N. caerulea	99.0	N. guineensis	100	Brachyceras
702	Nymphaea sp.	N. caerulea	99.1	N. guineensis	100	Brachyceras
714	Nymphaea sp.	N. zenkeri	99.0	N. capensis	100	/
724	blue flower	N. zenkeri	99.0	N. zenkeri/N. lotus	98.8	Lotos	N. zenkeri
733	yellow flower	N. caerulea/N. micrantha	97.7	N. capensis	100	Brachyceras	N. nouchali var. caerulea
742	pink flower	N. caerulea/N. micrantha	97.7	N. guineensis	99.9	Brachyceras
753	pink &white	N. caerulea/N. micrantha	98.9	N. capensis	99.9	Brachyceras	N. nouchali var. caerulea
761	yellow flower	N. caerulea/N. micrantha	97.7	N. capensis	99.9	Brachyceras	N. nouchali var. caerulea
771	pink & white flower	N. caerulea/N. micrantha	100	N. capensis	100	Brachyceras	N. nouchali var. caerulea
781	pink & white flower	N. caerulea/N. micrantha	100	N. capensis	100	Brachyceras	N. nouchali var. caerulea
794	pink & white flower	N. caerulea	98.7	N. capensis	100	Brachyceras	N. nouchali var. caerulea
803	pink & white flower	N. caerulea	99.1	N. capensis	100	Brachyceras	N. nouchali var. caerulea
813	pink & white flower	N. caerulea/N. micrantha	99.3	N. capensis	99.9	Brachyceras	N. nouchali var. caerulea
823	pink & white flower	N. caerulea	99.1	N. guineensis/N. micrantha	100	Brachyceras
835	pink & white flower	N. caerulea/N. micrantha	100	N. capensis	99.9	Brachyceras	N. nouchali var. caerulea
845	white	N. caerulea/N. micrantha	99.6	N. capensis	100	Brachyceras	N. nouchali var. caerulea
854	pink & white flower	N. caerulea/N. micrantha	100	N. guineensis/N. micrantha	100	Brachyceras	N. micrantha
865	pink & white flower	N. caerulea	99.0	N. capensis	99.9	Brachyceras	N. nouchali var. caerulea
873	pink & white flower	N. caerulea	99.0	N. capensis	100	Brachyceras	N. nouchali var. caerulea
884	white	N. caerulea	99.1	N. capensis	100	Brachyceras	N. nouchali var. caerulea
891	white	N. caerulea/N. micrantha	99.9	N. guineensis/N. micrantha	99.9	Brachyceras	N. micrantha
902	white	N. caerulea/N. micrantha	99.3	N. capensis	100	Brachyceras	N. nouchali var. caerulea
913	white	N. caerulea	99.3	N. capensis	99.9	Brachyceras	N. nouchali var. caerulea
921	Nymphaea sp.	N. caerulea	99.0	N. guineensis/N. micrantha	100	Brachyceras
3405	Nymphaea sp.	N. lotus	99.9	N. petersiana	99.9	Lotos
3406	Nymphaea sp.	N. nouchali	99.1	N. micrantha	98.5	Brachyceras
3461	Nymphaea sp.	N. nouchali	99.1	N. capensis	100	Brachyceras
ADM	small white flower	N. guineensis	99.6	N. guineensis	99.8	Brachyceras	N. guineensis
ANO	pink flower	N. micrantha	99.0	N. guineensis/N. micrantha	100	Brachyceras	N. micrantha
BAD	purple flower	N. lotus	99.9	/	/	Lotos
BBI	purple flower	N. caerulea/N. micrantha	100	N. guineensis/N. micrantha	100	Brachyceras	N. micrantha
BCH	N. lotus	N. lotus	99.9	N. lotus	99.9	Lotos	N. lotus
BCK	pink flower	N. caerulea/N. micrantha	99.9	N. guineensis/N. micrantha	100	Brachyceras	N. micrantha
BIU	N. lotus	N. lotus	100	N. lotus	100	Lotos	N. lotus
BK2	purple flower	N. caerulea/N. micrantha	99.7	N. guineensis/N. micrantha	99.9	Brachyceras	N. micrantha
BK3	purple flower	N. caerulea/N. micrantha	99.7	N. guineensis/N. micrantha	99.9	Brachyceras	N. micrantha
BKAR	N. lotus	N. lotus	100	N. lotus	99.9	Lotos	N. lotus
BKP	purple flower	N. caerulea/N. micrantha	99.9	N. guineensis/N. micrantha	99.9	Brachyceras	N. micrantha
BLW	N. lotus	N. lotus	100	N. lotus	99.8	Lotos	N. lotus
BSKL	small leaf	N. lotus	100	N. lotus	100	Lotos	N. lotus
BUC	N. lotus	N. lotus	100	N. lotus	100	Lotos	N. lotus
BWJ	N. caerulea	N. caerulea	99.9	N. capensis	100	Brachyceras	N. nouchali var. caerulea
BYN	Nymphaea sp.	N. caerulea	100	N. capensis	99.9	Brachyceras	N. nouchali var. caerulea
CAM01	Nymphaea sp.	N. zenkeri	99.3	N. zenkeri	99.0	Lotos	N. zenkeri
CAM02	Nymphaea sp.	N. zenkeri	99.1	N. zenkeri	99.0	Lotos	N. zenkeri
CAM05	Nymphaea sp.	N. caerulea	99.7	N. capensis	100	Brachyceras	N. nouchali var. caerulea
CAM15	Nymphaea sp.	N. caerulea/N. micrantha	100	N. capensis	100	Brachyceras	N. nouchali var. caerulea
CAM21	Nymphaea sp.	N. caerulea/N. micrantha	100	N. capensis	99.9	Brachyceras	N. nouchali var. caerulea
CAM22	Nymphaea sp.	N. zenkeri	99.3	N. lotus	99.9	Lotos
CAM23	Nymphaea sp.	N. zenkeri	99.3	N. lotus	100	Lotos
CAM39	Nymphaea sp.	N. caerulea/N. micrantha	100	N. capensis	100	Brachyceras	N. nouchali var. caerulea
CAM49	Nymphaea sp.	N. caerulea/N. micrantha	100	N. capensis	100	Brachyceras	N. nouchali var. caerulea
CAM50	Nymphaea sp.	N. zenkeri	99.3	N. lotus	100	Lotos
CAM52	Nymphaea sp.	N. caerulea/N. micrantha	100	N. capensis	100	Brachyceras	N. nouchali var. caerulea
CAM54	Nymphaea sp.	N. guineensis	100	N. guineensis	100	Brachyceras	N. guineensis
CAM60	Nymphaea sp.	N. zenkeri	99.3	N. zenkeri	98.9	Lotos	N. zenkeri
CAM62	Nymphaea sp.	N. zenkeri	99.1	N. zenkeri	99.0	Lotos	N. zenkeri
CHF	Nymphaea sp.	N. caerulea	100	N. capensis	99.9	Brachyceras	N. nouchali var. caerulea
CMS	N. caerulea	N. caerulea	99.1	N. capensis	99.9	Brachyceras	N. nouchali var. caerulea
DAK	purple flower	N. micrantha	99.9	/	/	Brachyceras
DBA	N. caerulea	N. caerulea	100	N. capensis	100	Brachyceras	N. nouchali var. caerulea
DDA	N. caerulea	N. caerulea	100	N. capensis	99.9	Brachyceras	N. nouchali var. caerulea
DID	Nymphaea sp.	N. lotus	100	N. micrantha	98.4	/
DMN	N. lotus	N. lotus	100	N. lotus	99.8	Lotos	N. lotus
DUT	N. lotus	N. lotus	100	N. lotus	99.6	Lotos	N. lotus
EBB	Nymphaea sp.	/	/	N. guineensis/N. micrantha	100	Brachyceras
ETB	N. lotus	N. lotus	100	N. lotus	99.4	Lotos	N. lotus
GBE	N. lotus	N. lotus	100	N. lotus	99.9	Lotos	N. lotus
GMBI	N. lotus	N. lotus	100	N. lotus	99.6	Lotos	N. lotus
GMN	N. petersiana	N. lotus	99.7	N. petersiana	98.4	Lotos
GOG	N. petersiana	N. lotus	100	N. zenkeri	98.7	Lotos
GRUI	N. lotus	N. lotus	100	N. lotus	100	Lotos	N. lotus
GSH	N. lotus	N. lotus	100	N. lotus	99.9	Lotos	N. lotus
GURI	purple flower	N. caerulea/N. micrantha	99.9	N. guineensis/N. micrantha	100	Brachyceras	N. micrantha
GUS	purple flower	N. caerulea/N. micrantha	99.9	N. guineensis/N. micrantha	99.9	Brachyceras	N. micrantha
HAD	N. lotus	N. lotus	100	N. lotus	99.9	Lotos	N. lotus
HDJ2	Nymphaea sp.	N. micrantha	98.8	N. micrantha	98.8	Brachyceras	N. micrantha
HOH	Nymphaea sp.	N. lotus	100	N. capensis	100	/
HPP	N. lotus	N. lotus	99.9	N. lotus	99.9	Lotos	N. lotus
IBD	N. lotus	N. lotus	99.9	N. lotus	99.9	Lotos	N. lotus
JH3P	purple flower	N. caerulea/N. micrantha	99.9	N. guineensis/N. micrantha	99.5	Brachyceras	N. micrantha
JHL1	N. lotus	N. lotus	100	/	/	Lotos
JIG	purple flower	N. caerulea/N. micrantha	99.9	N. guineensis/N. micrantha	100	Brachyceras	N. micrantha
JJA	N. lotus	N. lotus	100	N. lotus	99.6	Lotos	N. lotus
JOS3	N. lotus	N. lotus	100	N. lotus	100	Lotos	N. lotus
JOSI	purple flower	N. caerulea/N. micrantha	99.9	N. guineensis/N. micrantha	100	Brachyceras	N. micrantha
KAK	N. lotus	N. lotus	99.9	N. lotus	100	Lotos	N. lotus
KAN	small white flower	N. guineensis	99.7	N. guineensis/N. micrantha	100	Brachyceras	N. guineensis
KAR3	small white flower	N. lotus	100	/	/	Lotos
KAT	N. lotus	N. lotus	100	/	/	Lotos
KBB	N. lotus	N. lotus	100	N. lotus	99.8	Lotos	N. lotus
KBL	N. lotus	N. lotus	100	N. lotus	99.4	Lotos	N. lotus
KBS	N. nouchali	N. nouchali	99.3	N. micrantha	98.4	Brachyceras
KDT1	N. lotus	N. lotus	100	N. lotus	99.9	Lotos	N. lotus
KEB3	N. lotus	N. lotus	100	N. lotus	100	Lotos	N. lotus
KES	N. petersiana	N. lotus	99.7	N. capensis	100	/
KFN	pink flower	N. caerulea/N. micrantha	99.9	N. guineensis/N. micrantha	99.9	Brachyceras	N. micrantha
KGS	N. petersiana	N. lotus	99.7	N. petersiana	99.8	Lotos
KIB	N. lotus	N. lotus	99.9	N. lotus	100	Lotos	N. lotus
KIP	N. caerulea	N. caerulea	99.1	N. capensis	100	Brachyceras	N. nouchali var. caerulea
KISW	N. lotus	N. caerulea	100	N. capensis	100	Brachyceras	N. nouchali var. caerulea
KKE	pink flower	N. caerulea/N. micrantha	99.9	N. guineensis/N. micrantha	100	Brachyceras	N. micrantha
KMB	N. lotus	N. lotus	100	N. lotus	100	Lotos	N. lotus
KNO	N. lotus	N. lotus	100	N. lotus	99.0	Lotos	N. lotus
KSBR	N. caerulea	N. caerulea	99.0	N. capensis	99.9	Brachyceras	N. nouchali var. caerulea
KSWG	N. caerulea	N. caerulea	100	N. capensis	100	Brachyceras	N. nouchali var. caerulea
KTG	N. nouchali	N. nouchali	100	N. micrantha	98.5	Brachyceras
KTN	N. nouchali	N. nouchali	100	N. micrantha	98.5	Brachyceras
KUF	N. lotus	N. lotus	100	N. lotus	100	Lotos	N. lotus
KWT	N. nouchali	N. nouchali	99.6	N. micrantha	98.6	Brachyceras
KY	N. caerulea	N. caerulea	100	N. capensis	100	Brachyceras	N. nouchali var. caerulea
KYB	N. lotus	N. lotus	100	N. lotus	99.9	Lotos	N. lotus
KYG	N. lotus	N. lotus	100	N. lotus	99.9	Lotos	N. lotus
KYL	N. nouchali	N. nouchali	99.6	N. micrantha	98.5	Brachyceras
KZG	N. nouchali	N. nouchali	99.6	N. micrantha	98.6	Brachyceras
LPI	purple flower	N. caerulea/N. micrantha	100	N. guineensis/N. micrantha	99.9	Brachyceras	N. micrantha
MBRZ	N. caerulea	N. caerulea	100	N. capensis	100	Brachyceras	N. nouchali var. caerulea
MBT	N. lotus	N. lotus	100	N. lotus	100	Lotos	N. lotus
MDU	N. lotus	N. lotus	100	N. lotus	99.9	Lotos	N. lotus
MGB	N. heudelotii	N. caerulea	99.7	N. capensis	100	Brachyceras	N. nouchali var. caerulea
MKD	N. nouchali	N. nouchali	99.9	N. micrantha	98.6	Brachyceras
MLM	N. caerulea	N. caerulea	99.3	N. capensis	99.7	Brachyceras	N. nouchali var. caerulea
MSB	N. lotus	N. lotus	100	N. zenkeri	98.7	Lotos
MSBZ	N. nouchali	N. nouchali	99.9	N. micrantha	98.6	Brachyceras
MSK	N. nouchali	N. nouchali	100	N. micrantha	98.6	Brachyceras
MSKA	N. caerulea	N. caerulea	99.6	N. capensis	100	Brachyceras	N. nouchali var. caerulea
MSLK	N. petersiana	N. guineensis	99.7	N. micrantha	99.8	Brachyceras
MTDA	Nymphaea sp.	N. caerulea	99.3	N. capensis	100	Brachyceras	N. nouchali var. caerulea
MTR	N. lotus	N. minuta	98.4	N. micrantha	99.8	Brachyceras
MWB	N. heudelotii	N. caerulea	99.9	N. capensis	99.9	Brachyceras	N. nouchali var. caerulea
MYR	N. nouchali	N. nouchali	100	N. micrantha	98.5	Brachyceras
MYY	N. lotus	N. lotus	100	N. zenkeri	98.7	Lotos
NBG	Nymphaea sp.	N. caerulea	99.9	N. capensis	99.9	Brachyceras	N. nouchali var. caerulea
NBGO	Nymphaea sp.	N. caerulea	99.6	N. capensis	100	Brachyceras	N. nouchali var. caerulea
NGRI	purple flower	N. caerulea/N. micrantha	100	N. capensis	100	Brachyceras	N. nouchali var. caerulea
NY	N. lotus	N. lotus	99.9	N. lotus	100	Lotos	N. lotus
OND	Nymphaea sp.	N. caerulea	99.6	N. capensis	100	Brachyceras	N. nouchali var. caerulea
PWE	Nymphaea sp.	N. nouchali	100	N. micrantha	98.6	Brachyceras
RJJ	Nymphaea sp.	N. caerulea	100	N. guineensis/N. micrantha	99.9	Brachyceras
SAU	N. lotus	N. lotus	100	N. zenkeri	98.6	Lotos
SIL	Nymphaea sp.	N. caerulea/N. micrantha	99.9	N. capensis	99.8	Brachyceras	N. nouchali var. caerulea
SKT	N. lotus	N. lotus	100	N. zenkeri	98.8	Lotos
SOJ	Nymphaea sp.	N. caerulea/N. micrantha	99.9	N. guineensis/N. micrantha	100	Brachyceras	N. micrantha
SST	Nymphaea sp.	N. caerulea	100	N. capensis	99.8	Brachyceras	N. nouchali var. caerulea
TDE	N. lotus	N. lotus	100	N. lotus	100	Lotos	N. lotus
TDR	Nymphaea sp.	N. nouchali	99.9	N. micrantha	98.5	Brachyceras
TGN	N.petersiana	N. lotus	99.7	N. petersiana	98.5	Lotos
TIM	Nymphaea sp.	N. caerulea	99.1	N. capensis	100	Brachyceras	N. nouchali var. caerulea
USA	N. lotus	N. lotus	100	N. lotus	99.9	Lotos	N. lotus
YOB	purple flower	N. micrantha	99.7	N. guineensis/N. micrantha	99.9	Brachyceras	N. micrantha
ZAM	N. lotus	N. lotus	100	N. lotus	99.9	Lotos	N. lotus
ZBD	N. lotus	N. lotus	100	/	/	Lotos
ZDC	purple flower	N. caerulea	99.9	N. guineensis/N. micrantha	100	Brachyceras
ZLF	Nymphaea sp.	N. lotus	99.9	N. zenkeri	98.7	Lotos
ZNG	N. lotus	N. lotus	100	N. zenkeri	98.7	Lotos
ZRD	N.lotus	N. lotus	100	N. zenkeri	98.5	Lotos

## Sheet: Table S3
Table S3. The identification results based on phylogenetic analysis
No.	ITS	trnT-trnF	rpl16	trnT-trnF+rpl16	Together identification
671	N. caerulea				N. nouchali var. caerulea
685	N. caerulea				N. nouchali var. caerulea
695	N. caerulea				N. nouchali var. caerulea
702	N. caerulea				N. nouchali var. caerulea
714
724	N. zenkeri				N. zenkeri
733
742
753	N. caerulea				N. nouchali var. caerulea
761
771
781
794	N. caerulea				N. nouchali var. caerulea
803	N. caerulea				N. nouchali var. caerulea
813
823	N. caerulea				N. nouchali var. caerulea
835
845
854
865	N. caerulea				N. nouchali var. caerulea
873	N. caerulea				N. nouchali var. caerulea
884	N. caerulea				N. nouchali var. caerulea
891
902
913	N. caerulea				N. nouchali var. caerulea
921	N. caerulea				N. nouchali var. caerulea
3405		N. petersiana	N. petersiana	N. petersiana	N. petersiana
3406			N. nouchali	N. nouchali	N. nouchali
3461
ADM	N. guineensis				N. guineensis
ANO	N. micrantha				N. micrantha
BAD
BBI
BCH
BCK
BIU
BK2
BK3
BKAR
BKP
BLW
BSKL
BUC
BWJ
BYN
CAM01	N. zenkeri				N. zenkeri
CAM02	N. zenkeri				N. zenkeri
CAM05
CAM15
CAM21
CAM22	N. zenkeri				N. zenkeri
CAM23	N. zenkeri				N. zenkeri
CAM39
CAM49
CAM50	N. zenkeri				N. zenkeri
CAM52
CAM54	N. guineensis				N. guineensis
CAM60	N. zenkeri				N. zenkeri
CAM62	N. zenkeri				N. zenkeri
CHF
CMS	N. caerulea				N. nouchali var. caerulea
DAK
DBA
DDA
DID		N. nouchali	N. nouchali	N. nouchali	/
DMN
DUT
EBB
ETB
GBE
GMBI
GMN	N. petersiana	N. petersiana	N. petersiana	N. petersiana	N. petersiana
GOG
GRUI
GSH
GURI
GUS
HAD
HDJ2	N. micrantha			N. nouchali	/
HOH
HPP
IBD
JH3P
JHL1
JIG
JJA
JOS3
JOSI
KAK
KAN	N. guineensis				N. guineensis
KAR3
KAT
KBB
KBL
KBS		N. nouchali	N. nouchali	N. nouchali	N. nouchali
KDT1
KEB3
KES
KFN
KGS	N. petersiana	N. petersiana	N. petersiana	N. petersiana	N. petersiana
KIB
KIP	N. caerulea				N. nouchali var. caerulea
KISW
KKE
KMB
KNO
KSBR
KSWG
KTG		N. nouchali	N. nouchali	N. nouchali	N. nouchali
KTN		N. nouchali	N. nouchali	N. nouchali	N. nouchali
KUF
KWT		N. nouchali	N. nouchali	N. nouchali	N. nouchali
KY
KYB
KYG
KYL		N. nouchali	N. nouchali	N. nouchali	N. nouchali
KZG		N. nouchali	N. nouchali	N. nouchali	N. nouchali
LPI
MBRZ
MBT
MDU
MGB
MKD		N. nouchali	N. nouchali	N. nouchali	N. nouchali
MLM	N. caerulea				N. nouchali var. caerulea
MSB
MSBZ		N. nouchali	N. nouchali	N. nouchali	N. nouchali
MSK		N. nouchali	N. nouchali	N. nouchali	N. nouchali
MSKA
MSLK	N. guineensis				N. guineensis
MTDA	N. caerulea				N. nouchali var. caerulea
MTR				N. nouchali	N. nouchali
MWB
MYR		N. nouchali	N. nouchali	N. nouchali	N. nouchali
MYY
NBG
NBGO
NGRI
NY
OND	N. caerulea				N. nouchali var. caerulea
PWE		N. nouchali	N. nouchali	N. nouchali	N. nouchali
RJJ
SAU
SIL
SKT
SOJ
SST
TDE
TDR		N. nouchali	N. nouchali	N. nouchali	N. nouchali
TGN	N.petersiana	N. petersiana	N. petersiana	N. petersiana	N.petersiana
TIM	N. caerulea				N. nouchali var. caerulea
USA
YOB	N. micrantha				N. micrantha
ZAM
ZBD
ZDC
ZLF	N. petersiana				/
ZNG
ZRD

## Sheet: Table S4
Table S4. The species identification rusults of African Nymphaea
No.	Morphological taxonomy	Identification results by BLAST	Identification results by phylogenetic	Species identification
671	Nymphaea sp.	N. nouchali var. caerulea	N. nouchali var. caerulea	N. nouchali var. caerulea
685	Nymphaea sp.	N. nouchali var. caerulea	N. nouchali var. caerulea	N. nouchali var. caerulea
695	Nymphaea sp.		N. nouchali var. caerulea	N. nouchali var. caerulea
702	Nymphaea sp.		N. nouchali var. caerulea	N. nouchali var. caerulea
714	Nymphaea sp.
724	blue flower	N. zenkeri	N. zenkeri	N. zenkeri
733	yellow flower	N. nouchali var. caerulea		N. nouchali var. caerulea
742	pink flower
753	pink &white	N. nouchali var. caerulea	N. nouchali var. caerulea	N. nouchali var. caerulea
761	yellow flower	N. nouchali var. caerulea		N. nouchali var. caerulea
771	pink & white flower	N. nouchali var. caerulea		N. nouchali var. caerulea
781	pink & white flower	N. nouchali var. caerulea		N. nouchali var. caerulea
794	pink & white flower	N. nouchali var. caerulea	N. nouchali var. caerulea	N. nouchali var. caerulea
803	pink & white flower	N. nouchali var. caerulea	N. nouchali var. caerulea	N. nouchali var. caerulea
813	pink & white flower	N. nouchali var. caerulea		N. nouchali var. caerulea
823	pink & white flower		N. nouchali var. caerulea	N. nouchali var. caerulea
835	pink & white flower	N. nouchali var. caerulea		N. nouchali var. caerulea
845	white	N. nouchali var. caerulea		N. nouchali var. caerulea
854	pink & white flower	N. micrantha		N. micrantha
865	pink & white flower	N. nouchali var. caerulea	N. nouchali var. caerulea	N. nouchali var. caerulea
873	pink & white flower	N. nouchali var. caerulea	N. nouchali var. caerulea	N. nouchali var. caerulea
884	white	N. nouchali var. caerulea	N. nouchali var. caerulea	N. nouchali var. caerulea
891	white	N. micrantha		N. micrantha
902	white	N. nouchali var. caerulea		N. nouchali var. caerulea
913	white	N. nouchali var. caerulea	N. nouchali var. caerulea	N. nouchali var. caerulea
921	Nymphaea sp.		N. nouchali var. caerulea	N. nouchali var. caerulea
3405	Nymphaea sp.		N. petersiana	N. petersiana
3406	Nymphaea sp.		N. nouchali	N. nouchali
3461	Nymphaea sp.
ADM	small white flower	N. guineensis	N. guineensis	N. guineensis
ANO	pink flower	N. micrantha	N. micrantha	N. micrantha
BAD	purple flower
BBI	purple flower	N. micrantha		N. micrantha
BCH	N. lotus			N. lotus
BCK	pink flower	N. micrantha		N. micrantha
BIU	N. lotus	N. lotus		N. lotus
BK2	purple flower	N. micrantha		N. micrantha
BK3	purple flower	N. micrantha		N. micrantha
BKAR	N. lotus	N. lotus		N. lotus
BKP	purple flower	N. micrantha		N. micrantha
BLW	N. lotus	N. lotus		N. lotus
BSKL	small leaf	N. lotus		N. lotus
BUC	N. lotus	N. lotus		N. lotus
BWJ	N. caerulea	N. nouchali var. caerulea		N. nouchali var. caerulea
BYN	Nymphaea sp.	N. nouchali var. caerulea		N. nouchali var. caerulea
CAM01	Nymphaea sp.	N. zenkeri	N. zenkeri	N. zenkeri
CAM02	Nymphaea sp.	N. zenkeri	N. zenkeri	N. zenkeri
CAM05	Nymphaea sp.	N. nouchali var. caerulea		N. nouchali var. caerulea
CAM15	Nymphaea sp.	N. nouchali var. caerulea		N. nouchali var. caerulea
CAM21	Nymphaea sp.	N. nouchali var. caerulea		N. nouchali var. caerulea
CAM22	Nymphaea sp.		N. zenkeri	N. zenkeri
CAM23	Nymphaea sp.		N. zenkeri	N. zenkeri
CAM39	Nymphaea sp.	N. nouchali var. caerulea		N. nouchali var. caerulea
CAM49	Nymphaea sp.	N. nouchali var. caerulea		N. nouchali var. caerulea
CAM50	Nymphaea sp.		N. zenkeri	N. zenkeri
CAM52	Nymphaea sp.	N. nouchali var. caerulea		N. nouchali var. caerulea
CAM54	Nymphaea sp.	N. guineensis	N. guineensis	N. guineensis
CAM60	Nymphaea sp.	N. zenkeri	N. zenkeri	N. zenkeri
CAM62	Nymphaea sp.	N. zenkeri	N. zenkeri	N. zenkeri
CHF	Nymphaea sp.	N. nouchali var. caerulea		N. nouchali var. caerulea
CMS	N. caerulea	N. nouchali var. caerulea	N. nouchali var. caerulea	N. nouchali var. caerulea
DAK	purple flower
DBA	N. caerulea	N. nouchali var. caerulea		N. nouchali var. caerulea
DDA	N. caerulea	N. nouchali var. caerulea		N. nouchali var. caerulea
DID	Nymphaea sp.
DMN	N. lotus	N. lotus		N. lotus
DUT	N. lotus	N. lotus		N. lotus
EBB	Nymphaea sp.
ETB	N. lotus	N. lotus		N. lotus
GBE	N. lotus	N. lotus		N. lotus
GMBI	N. lotus	N. lotus		N. lotus
GMN	N. petersiana		N. petersiana	N. petersiana
GOG	N. petersiana
GRUI	N. lotus	N. lotus		N. lotus
GSH	N. lotus	N. lotus		N. lotus
GURI	purple flower	N. micrantha		N. micrantha
GUS	purple flower	N. micrantha		N. micrantha
HAD	N. lotus	N. lotus		N. lotus
HDJ2	Nymphaea sp.	N. micrantha		N. micrantha
HOH	Nymphaea sp.
HPP	N. lotus	N. lotus		N. lotus
IBD	N. lotus	N. lotus		N. lotus
JH3P	purple flower	N. micrantha		N. micrantha
JHL1	N. lotus			N. lotus
JIG	purple flower	N. micrantha		N. micrantha
JJA	N. lotus	N. lotus		N. lotus
JOS3	N. lotus	N. lotus		N. lotus
JOSI	purple flower	N. micrantha		N. micrantha
KAK	N. lotus	N. lotus		N. lotus
KAN	small white flower	N. guineensis	N. guineensis	N. guineensis
KAR3	small white flower
KAT	N. lotus			N. lotus
KBB	N. lotus	N. lotus		N. lotus
KBL	N. lotus	N. lotus		N. lotus
KBS	N. nouchali		N. nouchali	N. nouchali
KDT1	N. lotus	N. lotus		N. lotus
KEB3	N. lotus	N. lotus		N. lotus
KES	N. petersiana
KFN	pink flower	N. micrantha		N. micrantha
KGS	N. petersiana		N. petersiana	N. petersiana
KIB	N. lotus	N. lotus		N. lotus
KIP	N. caerulea	N. nouchali var. caerulea	N. nouchali var. caerulea	N. nouchali var. caerulea
KISW	N. lotus	N. nouchali var. caerulea		N. nouchali var. caerulea
KKE	pink flower	N. micrantha		N. micrantha
KMB	N. lotus	N. lotus		N. lotus
KNO	N. lotus	N. lotus		N. lotus
KSBR	N. caerulea	N. nouchali var. caerulea		N. nouchali var. caerulea
KSWG	N. caerulea	N. nouchali var. caerulea		N. nouchali var. caerulea
KTG	N. nouchali		N. nouchali	N. nouchali
KTN	N. nouchali		N. nouchali	N. nouchali
KUF	N. lotus	N. lotus		N. lotus
KWT	N. nouchali		N. nouchali	N. nouchali
KY	N. caerulea	N. nouchali var. caerulea		N. nouchali var. caerulea
KYB	N. lotus	N. lotus		N. lotus
KYG	N. lotus	N. lotus		N. lotus
KYL	N. nouchali		N. nouchali	N. nouchali
KZG	N. nouchali		N. nouchali	N. nouchali
LPI	purple flower	N. micrantha		N. micrantha
MBRZ	N. caerulea	N. nouchali var. caerulea		N. nouchali var. caerulea
MBT	N. lotus	N. lotus		N. lotus
MDU	N. lotus	N. lotus		N. lotus
MGB	N. heudelotii	N. nouchali var. caerulea		N. nouchali var. caerulea
MKD	N. nouchali		N. nouchali	N. nouchali
MLM	N. caerulea	N. nouchali var. caerulea	N. nouchali var. caerulea	N. nouchali var. caerulea
MSB	N. lotus			N. lotus
MSBZ	N. nouchali		N. nouchali	N. nouchali
MSK	N. nouchali		N. nouchali	N. nouchali
MSKA	N. caerulea	N. nouchali var. caerulea		N. nouchali var. caerulea
MSLK	N. petersiana		N. guineensis	N. guineensis
MTDA	Nymphaea sp.	N. nouchali var. caerulea	N. nouchali var. caerulea	N. nouchali var. caerulea
MTR	N. lotus		N. nouchali	N. nouchali
MWB	N. heudelotii	N. nouchali var. caerulea		N. nouchali var. caerulea
MYR	N. nouchali		N. nouchali	N. nouchali
MYY	N. lotus			N. lotus
NBG	Nymphaea sp.	N. nouchali var. caerulea		N. nouchali var. caerulea
NBGO	Nymphaea sp.	N. nouchali var. caerulea		N. nouchali var. caerulea
NGRI	purple flower	N. nouchali var. caerulea		N. nouchali var. caerulea
NY	N. lotus	N. lotus		N. lotus
OND	Nymphaea sp.	N. nouchali var. caerulea	N. nouchali var. caerulea	N. nouchali var. caerulea
PWE	Nymphaea sp.		N. nouchali	N. nouchali
RJJ	Nymphaea sp.
SAU	N. lotus			N. lotus
SIL	Nymphaea sp.	N. nouchali var. caerulea		N. nouchali var. caerulea
SKT	N. lotus			N. lotus
SOJ	Nymphaea sp.	N. micrantha		N. micrantha
SST	Nymphaea sp.	N. nouchali var. caerulea		N. nouchali var. caerulea
TDE	N. lotus	N. lotus		N. lotus
TDR	Nymphaea sp.		N. nouchali	N. nouchali
TGN	N.petersiana		N.petersiana	N.petersiana
TIM	Nymphaea sp.	N. nouchali var. caerulea	N. nouchali var. caerulea	N. nouchali var. caerulea
USA	N. lotus	N. lotus		N. lotus
YOB	purple flower	N. micrantha	N. micrantha	N. micrantha
ZAM	N. lotus	N. lotus		N. lotus
ZBD	N. lotus			N. lotus
ZDC	purple flower
ZLF	Nymphaea sp.
ZNG	N. lotus			N. lotus
ZRD	N.lotus			N.lotus

## Sheet: Table S5
Table S5. Primer name and sequences of DNA barcoding
Gene	Primer	Direction	sequence (5’-3’)
ITS4-ITS5	ITS4	R	TCCTCCGCTTATTGATATGC
	ITS5	F	GGAAGTAAAAGTCGTAACAAGG
rpl16	rpl16F	F	CTATGCTTAGTGTGTGACTC
	rpl16R	R	TCTTCCTCTATGTTGTTTACG
trnT-trnF	rps4-5R	F	AGGCCCTCGGTAACGSG
	trnL-110R	R	GATTTGGCTCAGGATTGCCC
	c	F	CGAAATCGGTAGACGCTACG
	f	R	ATTTGAACTGGTGACACGAG

## Sheet: Table S6
Table S6. Downloaded sequences from GenBank in this study
Species	Accession No.
	ITS	trnT-trnF	rpl16
N.lotus	MK452744*	NC041238*	NC041238
	MK452746*	MK040443*	MK040443
	MK452745	MK452761
		AM422040
N.nouchali	FJ198405*
	FJ597740
	FJ597741
	FJ597742
N.micrantha	FR717592*	FR717561*	AM421615
	FR717593*	AM422051*
	EU428065*	FR717562
N.guineensis	FR717587*	FR717556*
	FR717588*	FR717560*
	FR717589	AM422051*
		FR717558*
N.zenkeri	MK452743*	MK452758*
N.petersiana	FM242156	AM422053*	AM421615
N.minuta	EU428066*
N.caerulea	GQ468651*	AM422045
	FJ597738*
	GU199473
N.heudelotii	FJ026603	AM422052
N.capensis	AY707898	NC040167*	NC040167
	AY620421	MK111409*	MK111409
Euryale ferox	JF976313	MH778542	MH778542
Victoria cruziana	AY858643	KY392766	KY392766
Note：* means matched sequences with the highest similarity using BLAST.
